# Supplementary material for: Cognitive Impairment in Nonagenarians: Potential Metabolic Mechanisms Revealed by the Synergy of In Silico Gene Expression Modeling and Pathway Enrichment Analysis
Source: MDPI journal article supplement (doi:10.3390/ijms25063344), 2024-03-15
Supplement: s1 [file s1]

**Supplement**  
**Table S1. TWAS results.**

| Gene                      | Z-score   | p-value  | Significant |
|---------------------------|-----------|----------|-------------|
| Amigdala                  |           |          |             |
| PTPN22                    | -3.910881 | 0.000092 | yes         |
| ADAM33                    | 3.667582  | 0.000245 | no          |
| PEX13                     | 3.535061  | 0.000408 | no          |
| PHTF1                     | 3.514200  | 0.000441 | no          |
| ACER2                     | -3.487440 | 0.000488 | no          |
| Anterior cingulate cortex |           |          |             |
| LRRC25                    | -4.236971 | 0.000040 | yes         |
| PRB2                      | 3.698503  | 0.000217 | no          |
| DLX6                      | 3.582232  | 0.000341 | no          |
| CSF2RB                    | 3.397982  | 0.000679 | no          |
| FAM120AOS                 | -3.394392 | 0.000688 | no          |
| Caudate basal ganglia     |           |          |             |
| PHTF1                     | 3.837777  | 0.000124 | no          |
| CPNE7                     | -3.802630 | 0.000143 | no          |
| PSMG3                     | -3.690272 | 0.000224 | no          |
| PEX13                     | 3.638209  | 0.000275 | no          |
| DLX6                      | 3.553400  | 0.000380 | no          |
| Cerebellar Hemisphere     |           |          |             |
| HSPBP1                    | 3.695897  | 0.000219 | no          |
| PSMG3                     | -3.636988 | 0.000276 | no          |
| SH2D7                     | -3.622768 | 0.000291 | no          |
| PHTF1                     | 3.514200  | 0.000441 | no          |
| SH3BP5L                   | -3.509282 | 0.000449 | no          |
| Cerebellum                |           |          |             |
| LRRC25                    | -4.215465 | 0.000032 | yes         |
| PHTF1                     | 3.514200  | 0.000441 | no          |
| RP11-560J1.2              | -3.473626 | 0.000513 | no          |
| CPSF2                     | -3.370074 | 0.000751 | no          |

|                                 |           |          |     |
|---------------------------------|-----------|----------|-----|
| SHF                             | 3.348304  | 0.000813 | no  |
| Cortex                          |           |          |     |
| LRRC25                          | -4.117557 | 0.000038 | yes |
| SHF                             | -3.668321 | 0.000244 | no  |
| DUOX1                           | -3.647572 | 0.000265 | no  |
| PEX13                           | 3.638209  | 0.000275 | no  |
| DLX6                            | 3.582232  | 0.000341 | no  |
| Frontal Cortex                  |           |          |     |
| TMEM14A                         | 3.622834  | 0.000291 | no  |
| DLX6                            | 3.582232  | 0.000341 | no  |
| PEX13                           | 3.535061  | 0.000408 | no  |
| RP11-560J1.2                    | -3.466095 | 0.000528 | no  |
| LINC00390                       | -3.386918 | 0.000707 | no  |
| Hippocampus                     |           |          |     |
| AP1S3                           | -3.551922 | 0.000382 | no  |
| PHTF1                           | 3.514200  | 0.000441 | no  |
| PRB2                            | 3.489408  | 0.000484 | no  |
| DUOX1                           | -3.342924 | 0.000829 | no  |
| ADAM33                          | 3.250358  | 0.001153 | no  |
| Hypothalamus                    |           |          |     |
| LRRC25                          | -4.001752 | 0.000055 | yes |
| PRB2                            | 3.792066  | 0.000149 | no  |
| DLX6                            | 3.582232  | 0.000341 | no  |
| PEX13                           | 3.535061  | 0.000408 | no  |
| ELANE                           | -3.523711 | 0.000426 | no  |
| Nucleus accumbens basal ganglia |           |          |     |
| DUSP26                          | 3.657454  | 0.000255 | no  |
| PEX13                           | 3.638209  | 0.000275 | no  |
| AC016995.3                      | -3.615122 | 0.000300 | no  |
| DLX6                            | 3.582232  | 0.000341 | no  |
| TMEM14A                         | 3.516764  | 0.000437 | no  |
| Putamen basal ganglia           |           |          |     |

|                          |           |          |     |
|--------------------------|-----------|----------|-----|
| RASA1                    | -3.847408 | 0.000119 | no  |
| PSMG3                    | -3.732257 | 0.000190 | no  |
| DLX6                     | 3.582232  | 0.000341 | no  |
| NUPR2                    | 3.538227  | 0.000403 | no  |
| PEX13                    | 3.535061  | 0.000408 | no  |
| Spinal cord cervical c-1 |           |          |     |
| LRRC25                   | -4.116764 | 0.000061 | yes |
| PHTF1                    | 3.837777  | 0.000124 | no  |
| PSMG3                    | -3.700981 | 0.000215 | no  |
| ALKBH1                   | 3.671495  | 0.000241 | no  |
| SH3BP5L                  | -3.504508 | 0.000457 | no  |
| Substantia nigra         |           |          |     |
| LRRC25                   | -4.102217 | 0.000092 | yes |
| SH2D7                    | -3.705672 | 0.000211 | no  |
| PHTF1                    | 3.514200  | 0.000441 | no  |
| C1orf123                 | 3.417137  | 0.000633 | no  |
| RP11-560J1.2             | -3.392242 | 0.000693 | no  |

Note: Table presents 5 most significant genes in each brain part. Z-score>0 reflects upregulation of the gene and Z-score<0 reflects downregulation. The gene is significantly associated with cognitive impairment when  $p\text{-value}<10^{-4}$ .

**Table S2.** TWAS results for genes in the HALLMARK\_PEROXISOME functional pathway.

| Gene   | Z-score          |
|--------|------------------|
| PEX13  | 3.63820886611938 |
| CLN6   | 2.67555570602417 |
| PRDX1  | 2.1304612159729  |
| CAT    | 2.0485897064209  |
| FABP6  | 1.98931562900543 |
| FADS1  | 1.97097682952881 |
| ACSL1  | 1.73572699102896 |
| SEMA3C | 1.72525085686867 |
| LONP2  | 1.47963955172447 |

|         |                    |
|---------|--------------------|
| IDE     | 1.45531608775552   |
| ALDH9A1 | 1.44688725471497   |
| CRABP1  | 1.44518518447876   |
| NR1I2   | 1.4104517698288    |
| ECI2    | 1.31663165681787   |
| CTPS1   | 1.30026899642072   |
| YWHAH   | 1.18796241283417   |
| PEX6    | 1.18560476630797   |
| MVP     | 1.17668211460114   |
| ABCB1   | 1.12266480922699   |
| DLG4    | 0.959067106246948  |
| ATXN1   | 0.95817244052887   |
| PEX5    | 0.914699076559399  |
| ABCD2   | 0.888072848320007  |
| ABCC5   | 0.869463324546814  |
| HRAS    | 0.839134971993951  |
| CTBP1   | 0.819535734044322  |
| TSPO    | 0.639193713665009  |
| ACSL5   | 0.630192832736629  |
| IDH2    | 0.59225117554574   |
| EPHX2   | 0.58408540903497   |
| NUDT19  | 0.491290356768309  |
| CACNA1B | 0.491262867277656  |
| ALB     | 0.463138925188247  |
| VPS4B   | 0.431010156869888  |
| TTR     | 0.399503260850906  |
| SULT2B1 | 0.231715073335768  |
| CLN8    | 0.131551551428588  |
| RDH11   | 0.102856811678627  |
| ACOX1   | 0.0733462043704366 |

|          |                      |
|----------|----------------------|
| PEX11B   | 0.070492334663868    |
| SLC25A4  | 0.0358498468995094   |
| SLC25A17 | 0.0358004282490421   |
| HSD17B11 | 0.0162292336331964   |
| BCL10    | -0.00241431292544185 |
| ABCD3    | -0.039922684431076   |
| HMGCL    | -0.0734709141387598  |
| CDK7     | -0.0790873616933823  |
| SCP2     | -0.102061940059026   |
| GNPAT    | -0.10984994218952    |
| DHRS3    | -0.120071083307266   |
| CRABP2   | -0.192239640746695   |
| HSD3B7   | -0.192381531000137   |
| ISOC1    | -0.194867442135236   |
| PRDX5    | -0.257052481174469   |
| PEX11A   | -0.318717662768062   |
| ABCB4    | -0.321846929709755   |
| MLYCD    | -0.329452773788221   |
| ERCC3    | -0.362680524587631   |
| HSD17B4  | -0.408148258924484   |
| ECH1     | -0.411122857250775   |
| ELOVL5   | -0.498216636857585   |
| SLC35B2  | -0.645164489746094   |
| SMARCC1  | -0.671024193154455   |
| IDH1     | -0.672808706760406   |
| ABCC8    | -0.815831466189483   |
| ITGB1BP1 | -0.926862321708576   |
| CNBP     | -0.961186528205872   |
| ACOT8    | -1.05210288126392    |
| SLC27A2  | -1.05491077479041    |

|       |                   |
|-------|-------------------|
| SOD1  | -1.09255468845367 |
| PEX2  | -1.18128180503845 |
| ABCB9 | -1.27028942108154 |
| ACAA1 | -1.64269626140594 |
| FIS1  | -1.64325511455536 |
| CRAT  | -1.89146685600281 |
